# Supplementary material for: XA21-mediated resistance to Xanthomonas oryzae pv. oryzae is dose dependent
Source: PeerJ journal article supplement (doi:10.7717/peerj.17323), 2024-05-06

**A**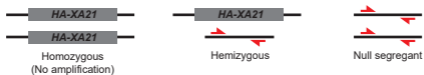**T1 progeny of T0-15A**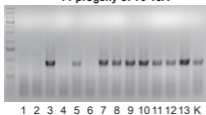**T1 progeny of T0-19A**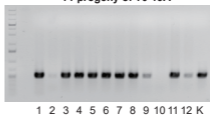**T1 progeny of T0-25A**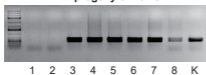**T1 progeny of T0-33A**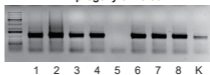**T1 progeny of T0-39A**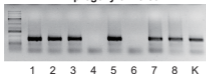**T1 progeny of T0-47A**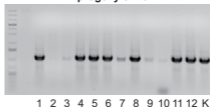**B**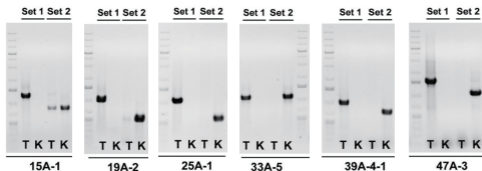

Supplement: Supplemental_Figure_S1.pdf [file Supplemental_Figure_S1.pdf]
