# Supplementary material for: XA21-mediated resistance to Xanthomonas oryzae pv. oryzae is dose dependent
Source: PeerJ journal article supplement (doi:10.7717/peerj.17323), 2024-05-06

# Xoo inoculation

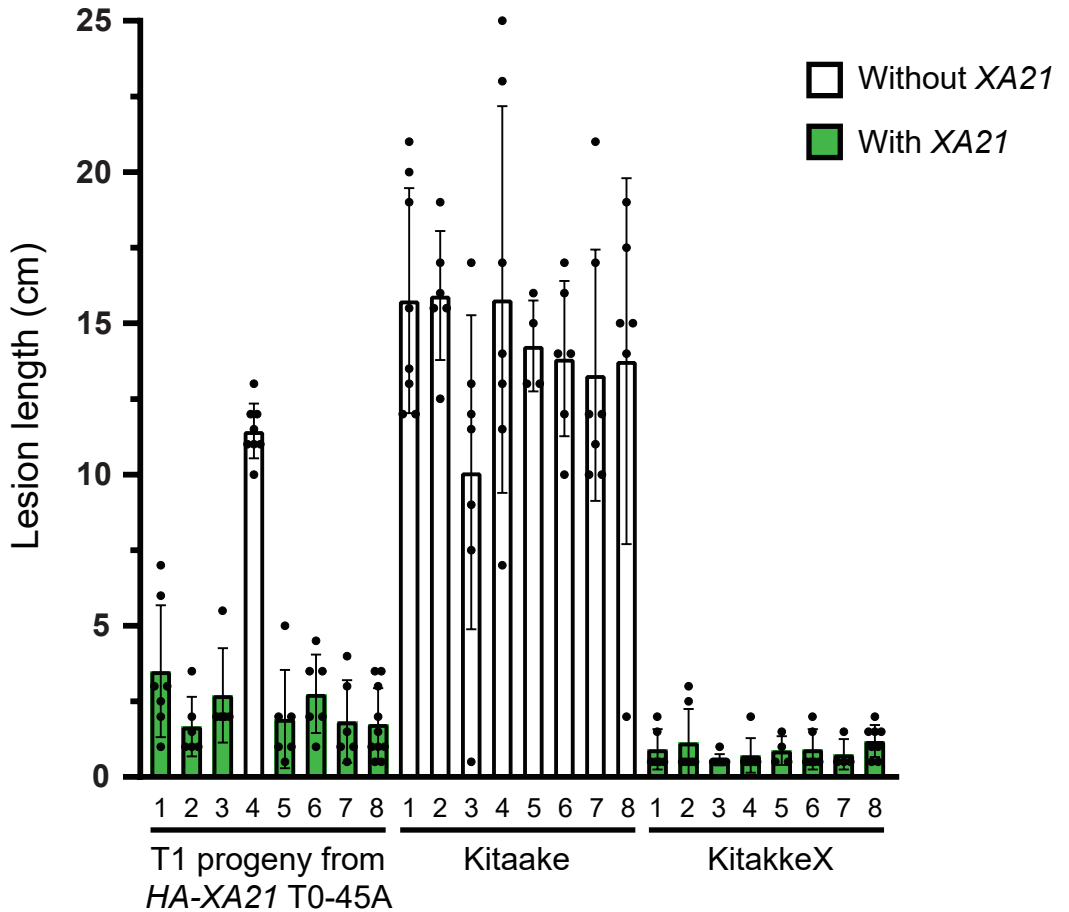

Supplement: Supplemental_Figure_S2.pdf [file Supplemental_Figure_S2.pdf]
